# Supplementary material
Source: Research Square preprint supplement (doi:10.21203/rs.3.rs-10185813/v1)
Supplement: Supplementary file 1 [file fdcad600fa75177654b06c3c.docx]

# Appendix

Appendix A: CONSORT 2010 checklist of information to include when reporting a pilot or feasibility trial1

| **Section/Topic** | **Item No** | **Checklist item** | **Reported on page No** |
| --- | --- | --- | --- |
| Title and abstract | | | |
|  | 1a | Identification as a pilot or feasibility randomised trial in the title | 1 |
| 1b | Structured summary of pilot trial design, methods, results, and conclusions (for specific guidance see CONSORT abstract extension for pilot trials) | 1,2 |
| Introduction | | | |
| Background and objectives | 2a | Scientific background and explanation of rationale for future definitive trial, and reasons for randomised pilot trial | 4,5 |
| 2b | Specific objectives or research questions for pilot trial | 5 |
| Methods | | | |
| Trial design | 3a | Description of pilot trial design (such as parallel, factorial) including allocation ratio | 5 |
| 3b | Important changes to methods after pilot trial commencement (such as eligibility criteria), with reasons | NA |
| Participants | 4a | Eligibility criteria for participants | 6 |
| 4b | Settings and locations where the data were collected | 6 |
|  | 4c | How participants were identified and consented | 6 |
| Interventions | 5 | The interventions for each group with sufficient details to allow replication, including how and when they were actually administered | 7 |
| Outcomes | 6a | Completely defined prespecified assessments or measurements to address each pilot trial objective specified in 2b, including how and when they were assessed | 8,9, Appendix 4 |
| 6b | Any changes to pilot trial assessments or measurements after the pilot trial commenced, with reasons | NA |
|  | 6c | Remote delivery was prespecified as a progression criterion; given high acceptability and feasibility in the pilot, the definitive trial will implement fully remote delivery. | 3 |
| Sample size | 7a | Rationale for numbers in the pilot trial | 6 |
| 7b | When applicable, explanation of any interim analyses and stopping guidelines | NA |
| Randomisation: |  |  |  |
| Sequence  generation | 8a | Method used to generate the random allocation sequence | 6, Appendix 2 |
| 8b | Type of randomisation(s); details of any restriction (such as blocking and block size) | 6, Appendix 2 |
| Allocation  concealment  mechanism | 9 | Mechanism used to implement the random allocation sequence (such as sequentially numbered containers), describing any steps taken to conceal the sequence until interventions were assigned | 6, Appendix 2 |
| Implementation | 10 | Who generated the random allocation sequence, who enrolled participants, and who assigned participants to interventions | Appendix 2 |
| Blinding | 11a | If done, who was blinded after assignment to interventions (for example, participants, care providers, those assessing outcomes) and how | 8 |
| 11b | If relevant, description of the similarity of interventions | NA |
| Statistical methods | 12 | Methods used to address each pilot trial objective whether qualitative or quantitative | 8,9 |
| Results | | | |
| Participant flow (a diagram is strongly recommended) | 13a | For each group, the numbers of participants who were approached and/or assessed for eligibility, randomly assigned, received intended treatment, and were assessed for each objective | 9-10; Figure 1 |
| 13b | For each group, losses and exclusions after randomisation, together with reasons | 9-10; Figure 1 |
| Recruitment | 14a | Dates defining the periods of recruitment and follow-up | 9 |
| 14b | Why the pilot trial ended or was stopped | NA |
| Baseline data | 15 | A table showing baseline demographic and clinical characteristics for each group | Table 2 |
| Numbers analysed | 16 | For each objective, number of participants (denominator) included in each analysis. If relevant, these numbers  should be by randomised group | Figure 1, Table 2, Appendix 13 |
| Outcomes and estimation | 17 | For each objective, results including expressions of uncertainty (such as 95% confidence interval) for any  estimates. If relevant, these results should be by randomised group | NA |
| Ancillary analyses | 18 | Results of any other analyses performed that could be used to inform the future definitive trial | Table 1 |
| Harms | 19 | All important harms or unintended effects in each group (for specific guidance see CONSORT for harms) | Table 1 |
|  | 19a | If relevant, other important unintended consequences | NA |
| Discussion | | | |
| Limitations | 20 | Pilot trial limitations, addressing sources of potential bias and remaining uncertainty about feasibility | 17 |
| Generalisability | 21 | Generalisability (applicability) of pilot trial methods and findings to future definitive trial and other studies | 17-18 |
| Interpretation | 22 | Interpretation consistent with pilot trial objectives and findings, balancing potential benefits and harms, and  considering other relevant evidence | 16-18 |
|  | 22a | Implications for progression from pilot to future definitive trial, including any proposed amendments | 17-18 |
| Other information | | |  |
| Registration | 23 | Registration number for pilot trial and name of trial registry | 5 |
| Protocol | 24 | Where the pilot trial protocol can be accessed, if available | NA |
| Funding | 25 | Sources of funding and other support (such as supply of drugs), role of funders | 19 |
|  | 26 | Ethical approval or approval by research review committee, confirmed with reference number | 8 |

**Appendix B: Additional information about randomization and its implementation**

After baseline assessment, participants were randomized into one of the arms of the trial by a research assistant, an enhanced usual care (EUC) team member, while outcome assessors were not aware of the allocated intervention. For randomization, opaque sealed envelopes were used. The randomization codes were generated by a statistician. Each randomization code was assigned a specific envelope ID. These IDs were written on the outside of envelopes by the field team lead and were double-checked by the project coordinator. Inside each envelope was a message indicating the intervention arm and a randomization code. Each envelope was sealed, signed, and left in a secure, locked cabinet in each project site’s office (the room where EUC happens, and only the EUC specialist had a key). Once the data collector completed the baseline assessment with the participant, they referred the participant to the EUC specialist for the randomization and EUC session. Before seeing the participants, the EUC specialist took the next envelope from the locked box, keeping them in order, then opened it with the participant, reading the text written inside. Randomization was blocked (in blocks of 20 participants) in random order.

Envelopes had to be taken in the order specified by the randomization sheet; therefore, EUC specialists selected envelopes starting from the top of the pile. Once the text had been read, the EUC specialist proceeded with the EUC information sheet with all participants regardless of allocation. The EUC specialist was instructed not to share the randomisation information with anyone. If a participant was randomized to the intervention arm, the EUC specialist referred the client to an available facilitator to schedule their first session. After each EUC session, the EUC specialist filled out the separate log with EUC and randomization details (maintained separately from outcome assessors).

For online the randomization procedures, all steps were identical, while specialists received extra instruction regarding preparation for the online meetings and organizing the space/technical aspects, agreeing with a client on a suitable platform, while ensuring that the participant has the relevant conditions and means as well. The EUC specialists joined each meeting with clients after the baseline assessment via the same link or invited the participant to the meeting through the same platform where the initial assessment was conducted, but separately from the outcome assessor. For the online procedures, each envelope was opened in front of the camera, so that the participant could see the envelope and read the text inside it.

**Appendix C. Description on primary and secondary outcomes (to be used to assess effectiveness in definitive trial)**

| **Instrument** | **Description** | **Outcome** | **Contextual validity** |
| --- | --- | --- | --- |
| **Primary outcome** | | | |
| Timeline Followback 2 | Diary method to retrospectively assess daily estimates of drinking. | Percentage days abstinent (PDA): Proportion of past 14 days on which participant was abstinent; mean score; | Validated for alcohol use assessment 2 |
| **Secondary outcomes** | | | |
| Timeline Followback 2 | Diary method to retrospectively assess daily estimates of drinking. | PDHD (percentage days of heavy drinking): heavy alcohol use in the previous 14 day; mean score | Validated for alcohol use assessment 2 |
| AUDIT 3 | Ten-item questionnaire to measure  alcohol intake, identify potential dependence on alcohol; and experiences of alcohol-related harm. Each item assessed on a scale of 0 to 4. | Mean score, and dichotomous as secondary outcome. | The AUDIT has been used in Ukraine4 |
| ASSIST5 | Eight-item screening questionnaire on estimates of alcohol use, tobacco products, and other drugs across the lifetime and in the past three months. Measured on a scale of 0 to 7. | Mean score. | Validated in a multisite international study covering Australia, Brazil, India, Thailand, United Kingdom, USA, and Zimbabwe5. |
| K-10 6 | Ten-item scale on non-specific psychological distress, scored on a scale of 1 to 5. | Mean score. | Validated in Ukraine including amongst war-affected Ukrainians6-8 |
| MHAI9 | Thirty-two item scale on depression, post-traumatic stress, anxiety, functioning and alcohol use. | Mean score. | The Mental Health Assessment Inventory (MHAI) represents a locally validated measure that combines adapted standard screeners with items derived locally in Ukraine. The MHAI has been shown to be a valid and reliable measure among conflict-affected populations in Ukraine and a shortened version of the instrument has been produced using item-response theory9,10 |
| United Nations Multi Country Study on Men and Violence 11 | Eleven items are used to measure the prevalence of perpetration of violence in the last 3 months. The items are assessed on a scale of 1 to 4, or 1 to 7. | Prevalence of IPV split by type of intimate partner violence (physical, sexual). | Previously validated in  Bangladesh, China, Cambodia, Indonesia, Sri Lanka, and Papua New Guinea 11 |
| EQ-5D-5L  (EuroQol five-dimension, five-level questionnaire12 | Five item questionnaire with 5 levels developed by EuroQol to assess the quality of life in the dimensions of mobility, self-care, usual activities, pain/discomfort and anxiety/depression. The choice levels for each dimension range from 1 (no problems) to 5 (extreme problems or unable to function)18. A vertical visual analogue scale (VAS) from 0 (worst health imaginable) to 100 (best health imaginable) is also applied alongside the 5 dimensions12. | Mean Score. | Validated across different contexts including Ukraine (https://euroqol.org/register/obtain-eq-5d/available-versions/) |
| SWB  (Subjective Wellbeing) 13 | Five item questionnaire with 5 levels to assess the wellbeing across the dimensions of: life satisfaction, worthwhile activities, happiness, worry and depression. A Likert scale where 1 indicates poor wellbeing and 5 indicates better wellbeing13. | Mean score | Used across countries in the Gallup world poll which covers more than 150 countries, including Ukraine (<https://www.gallup.com/analytics/349487/world-happiness-report.aspx>) |

**Appendix D: Feasability assessment table**

| **OBJECTIVES OF FEASABILITY TRIAL** | **ASSESSMENT CRITERIA** | **METHOD** | **TIME OF ASSESSMENT** |
| --- | --- | --- | --- |
| 1. **Piloting trial procedures** |  |  |  |
| **Recruitment:** To investigate recruitment and expected recruitment timeline to reach target sample size | - Number of participants approached - Number assessed for eligibility - Number eligible - Recruitment rate per month - Number consented or enrolled - Number of dropouts before randomization | - Raw count (number or %), and calculation of recruitment rate and duration (participants enrolled per month) | - Interim assessment (continuous monitoring throughout the recruitment phase) |
|  | - Barriers towards recruitment | - Qualitative interviews research assistants | - At time of recruitment |
| **Randomisation:** To investigate if randomization was successful | - Baseline characteristics between both groups by using descriptive statistics (e.g. similar distributions) | - Quantitative descriptive analysis | - Right after randomization was complete |
|  | - Randomization process | - Checking the correct use of random number generator, and allocation concealment | - At the start of randomization |
| **Retention:** To investigate how well participants stayed in the trial through follow up | - Overall retention rate - Overall drop-outs by sub-group (e.g. age, ethnicity, education, marital status, employment) - Timing of drop out in intervention group (e.g. after specific sessions; at 3 months follow-up), and reason | - Quantitative descriptive analysis - Sessions tracking database | - Interim assessments - End of intervention |
|  | - Dose (number of sessions received per participant) | - Sessions tracking database | - After each session |
| **Data collection:** To investigate if data collection was possible and conducted accurately | - Completeness (%) for primary and secondary outcomes - Missing values across time points, variables, participants - Data accuracy: Out of range checks; wrong entries | - Quantitative descriptive analysis | - Monitoring during early data collection phase - End of data collection |
| 1. **Testing early implementation outcomes, and safety of CHANGE** |  |  |  |
| **Feasibility of delivery:** To investigate if trained facilitators can deliver the intervention and session content as intended, and/or if there are any barriers to service delivery. | - (…) the extent to which a new treatment, or an innovation, can be successfully used or carried out within a given agency or setting14. | - Qualitative interviews with trained facilitators | - After the 3 months follow up |
|  | - Intervention fidelity checks (i.e. with regards to session content) | - Fidelity checklist (filled in by intervention supervisors) | - End of sessions |
| - Session length (in minutes) | - Tracking of time (with watch) | - During intervention delivery |
| **Acceptability of session content**: To assess if CHANGE is suitable to the target population, and if participants and trained facilitators find the intervention and its content acceptable | - (…) the perception that a given treatment, service, practice, or innovation is agreeable, palatable, or satisfactory.14 | - Qualitative interviews with participants, family members and trained facilitators | - After the 3 months follow up |
| **Serious adverse events (SAEs) / adverse events (AEs):** To assess if any safety concerns and risks are linked to the intervention, or the process of delivery | - Number of SAEs/AEs (related and unrelated to intervention) | - Field notes and logs by research director | - Continuously during study |
| 1. **Perceived effectiveness of CHANGE** |  |  |  |
| **Perceived effectiveness:** To explore qualitatively how participants perceive the intervention and its impact on drinking and well-being | - Perceived reduction in alcohol misuse and perceived improvement in mental well-being14 | - Qualitative interviews with participants | - After 3 months follow up |

**Appendix E: Feasibility criteria for progression to a full trial**

| **KEY FEASABILITY OUTCOMES** | **FEASABILITY CRITERIA FOR PROGRESSION TO FULL TRIAL** |
| --- | --- |
| **Piloting trial procedures** |  |
| **Recruitment** | Analysis of qualitative themes suggests that safety risks within the war context and the constraints of martial law could slow down recruitments. To mitigate these risks recruitment via internet and social media is indicated, recruitment will be expanded to all government controlled regions of Ukraine, while continuing to exclude occupied territories to mitigate potential psychological and physical safety risks associated with research participation in those settings. |
| **Randomisation** | No barriers to randomisation (participant’ acceptance of process, logistical feasibility of randomization in setting) |
| **Retention** | Retention of at least 65% (i.e. 35% loss to follow-up) of men through follow up |
| **Data collection** | Fewer than 20% missing items on outcome measures across all assessments |
| **Testing early implementation outcomes, and safety of CHANGE** |  |
| **Feasibility of delivery** | Analysis of qualitative themes suggests that due to safety risks within the war context and the constraints of martial law, participants consistently expressed a preference for remote intervention delivery over face-to-face sessions. Accordingly, to enhance feasibility the CHANGE intervention will be delivered entirely remotely (online or by telephone) in the full RCT. |
| **Acceptability of session content** | Analysis of qualitative themes suggests that participants facilitators perceive the intervention as acceptable. Qualitative data suggest that minor adaptations of intervention manual without altering the core intervention content are required: addition of a section on remote counselling, the introduction of an optional seventh session to review and consolidate previously learned strategies, and the inclusion of contextual information relevant to the war setting (e.g., a dedicated text block addressing stigma related to alcohol use and help-seeking). |
| **Serious adverse events (SAEs) / adverse events (AEs** | There are no safety concerns that are related to the intervention itself. |
| **Perceived effectiveness of CHANGE** |  |
| **Perceived effectiveness** | Analysis of qualitative themes suggests that facilitators perceive the intervention as effective. |

**Appendix F: Fidelity checklist for CHANGE intervention**

**Phase 1**

**SESSION 1**

| *No.* | *Item* | *Components Checklist (Circle or mark all that apply/that are completed)* |
| --- | --- | --- |
| 1.2 | What is PM+A? | 1. Discussing reasons for and challenges to attending CHANGE sessions 2. Learning to manage any obstacles to attending sessions |
| 1.3 | What is Adversity | 1. Working through the definition of adversity using clients’own examples 2. Discussing and normalising common reactions to adversity 3. Discussing how CHANGE aims to help participants manage their problems |

**SESSION 2**

| *No* | *Item* | *Components (Circle or mark all that apply)* |
| --- | --- | --- |
| 2.1 | Explore Drinking | 1. Engaging with the exploration of drinking based on AUDIT scores |
| 2.2 | Personalised Feedback | 1. Discussing personalised feedback based on the AUDIT scores |
| 2.3 | Psychoeducation on Drinking | 1. Understanding the psychoeducation about effects of alcohol |
| 2.4 | Pros and Cons | 1. Identifying Pros and Cons of drinking |
| 2.5 | Goal Setting | A. Setting a drinking goal  B. Setting SMART-CV sub-goals |
| 2.6 | Developing a Change Plan | A. Using the change plan worksheet to develop a Change Plan  B. Scheduling activities from the Change Plan |

*From your point of view, did this participant complete phase 1 to satisfaction?*

*Yes No*

**Phase 2**

**SESSION 3**

| No | Item | Components (circle or mark all that apply) |
| --- | --- | --- |
| 3.1 | Identify High-Risk Situations | A. Identifying high risk situations i.e. triggers for drinking  B. Learning appropriate strategies to deal with high-risk situations |
| 3.2 | Learn and Practice Managing Stress Exercise | A. Learning how stress affects the body  B. Learning and practicing breathing from the diaphragm/stomach (balloon exercise) |
| 3.3 | Learn and Practice Managing Emotions Exercise | A. Learning and understanding types of emotions people experience and the relationship between thoughts, emotions, and behaviours  B. Going through steps in emotion management using the thought records |

**SESSION 4**

| No. | Item | Components (circle or mark all that apply) |
| --- | --- | --- |
| 4.1 | Introduce Managing Problems | A. Learning strategy Managing problems for practical problems  B. Applying the strategy to a chosen problem  C. Developing an action plan |

*From your point of view, did this participant complete phase 2 to satisfaction?*

*Yes No*

**Phase 3**

**SESSION 5**

| No. | Item | Components (circle or mark all that apply) |
| --- | --- | --- |
| 5.1 | Get Going and Keep Doing and the Inactivity cycle | A. Learning Get Going and Keep Doing strategy  B. Learning the Inactivity Cycle  C. Discussing how inactivity cycle can be broken |
| 5.2 | Apply Get Going Keep Doing with an enjoyable activity | A. Selecting an enjoyable activity  B. Breaking down their activity into small steps  C. Developing an action plan |
| 5.3 | Strengthening Social Support | A. Discussing different social supports and how they can be helpful |
| 5.4 | Apply Strengthening Social Support | A. Identifying how to strengthen their social support  B. Developing and rehearsing the action plan |

**SESSION 6**

| No. | Item | Components (circle or mark all that apply) |
| --- | --- | --- |
| 6.1 | Overall management of challenges across phases | 1. Managing any challenges faced with any of the home practice |
| 6.2 | Staying Well | A. Learning about lapse and relapse  B. Discussing potential future high-risk situations and how to prevent and respond to lapse or relapse |
| 6.3 | How to help others | A. Using the case examples to discuss how to help others experiencing problems |
| 6.4 | Looking Forward | A. Reviewing goals that were not achieved  B. Discussing how to work towards these goals  C. Identifying new goals |

*From your point of view, did this participant complete phase 3 to satisfaction? Yes No*

**Appendix G: Statistical Methods to assess preliminary impact of CHANGE**

For quantitative analyses, descriptive statistics were used to describe the sample. Intention to treat analyses was conducted and we estimated the treatment effect with 95% CI as incidence rate ratios (primary outcome), odds ratios (binary secondary outcomes) or adjusted mean differences (continuous outcomes) using Stata 18.5.15 Because the primary outcome, days abstinent from alcohol, is likely to be overdispersed with a high number of zeros, we fit models using negative binomial, beta-binomial with logit link function, and beta-binomial with complementary log-log link function and assessed model fit using Akaike’s Information Criterion (AIC)16. We report the result of the model with best fit (beta-binomial with complementary log-log link function.) In addition to this, for the health-related quality of life analysis, the health states were converted into utility scores and we used the Poland EQ-5D-5L value set17

**Appendix H: Sub-group analyses of participants who dropped out of programme**

| **Variables** |  | **Lost to follow-up** |  | **Total** |  |
| --- | --- | --- | --- | --- | --- |
|  |  | n | % | n | % |
| **Total** |  | 21 | 100 | 62 | 100 |
| **Age in years** |  |  |  |  |  |
|  | 18-29 | 1 | 4,8 | 9 | 14,5 |
|  | 30-29 | 8 | 38,1 | 20 | 32,2 |
|  | 40-49 | 6 | 28,6 | 22 | 35,5 |
|  | 50+ | 6 | 28,6 | 11 | 17,7 |
| **Educational attainment** | |  |  |  |  |
|  | Secondary/technic-professional | 11 | 52,4 | 22 | 35,5 |
|  | University (undergraduate or postgraduate) | 10 | 47,6 | 40 | 64,5 |
| **Marital status** |  |  |  |  |  |
|  | Single/separated/widowed | 14 | 66,7 | 33 | 53,2 |
|  | Currently married | 7 | 33,3 | 29 | 46,8 |
| **Working status** | |  |  |  |  |
|  | Refused | 0 | 0,0 | 1 | 1,6 |
|  | Unemployed | 7 | 33,3 | 13 | 21,0 |
|  | Formal/casual/self-employed | 14 | 66,7 | 48 | 77,4 |
| **Displacement status** | |  |  |  |  |
|  | Refused | 0 | 0,0 | 1 | 1,6 |
|  | Not displaced | 12 | 57,1 | 25 | 40,3 |
|  | Displaced | 9 | 42,9 | 36 | 58,1 |
| **Involved with military action in the past** | |  |  |  |  |
|  | No | 21 | 100,0 | 62 | 100 |
|  | Yes | 0 | 0,0 | 0 | 0 |
| **Location within Ukraine** | |  |  |  |  |
|  | Dnipro | 15 | 71,4 | 30 | 48,4 |
|  | Kyiv | 6 | 28,6 | 32 | 51,6 |

**Appendix I: Baseline characteristics of pilot study population stratified by treatment allocation (N = 62)**

| **Variables** |  | **CHANGE+EUC** |  | **EUC** |  | **Total** |  |
| --- | --- | --- | --- | --- | --- | --- | --- |
|  |  | n | % | n | % | n | % |
| **Total** |  | 31 | 100 | 31 | 100 | 62 | 100 |
| **Age in years** |  |  |  |  |  |  |  |
|  | 18-29 | 2 | 6,5 | 7 | 22,6 | 9 | 14,5 |
|  | 30-39 | 10 | 32,3 | 10 | 32,3 | 20 | 32,2 |
|  | 40-49 | 13 | 41,9 | 9 | 29,0 | 22 | 35,5 |
|  | 50+ | 6 | 19,4 | 5 | 16,1 | 11 | 17,7 |
| **Educational attainment** |  |  |  |  |  |  |  |
|  | Secondary/technic-professional | 13 | 41,9 | 9 | 29,0 | 22 | 35,5 |
|  | University (undergraduate or postgraduate) | 18 | 58,1 | 22 | 71,0 | 40 | 64,5 |
| **Marital status** |  |  |  |  |  |  |  |
|  | Single/separated/widowed | 17 | 54,8 | 16 | 51,6 | 33 | 53,2 |
|  | Currently married | 14 | 45,2 | 15 | 48,4 | 29 | 46,8 |
| **Working status** |  |  |  |  |  |  |  |
|  | Refused | 0 | 0 | 1 | 3,2 | 1 | 1,6 |
|  | Unemployed | 7 | 22,6 | 6 | 19,4 | 13 | 21,0 |
|  | Formal/casual/self-employed | 24 | 77,4 | 24 | 77,4 | 48 | 77,4 |
| **Displacement status** |  |  |  |  |  |  |  |
|  | Refused | 0 | 0 | 1 | 3,2 | 1 | 1,6 |
|  | Not displaced | 17 | 54,8 | 8 | 25,8 | 25 | 40,3 |
|  | Displaced | 14 | 45,2 | 22 | 71,0 | 36 | 58,1 |
| **Involved with military action in the past** | |  |  |  |  |  |  |
|  | No | 31 | 100 | 31 | 100 | 62 | 100 |
|  | Yes | 0 | 0 | 0 | 0 | 0 | 0 |
| **Location within Ukraine** |  |  |  |  |  |  |  |
|  | Dnipro | 15 | 48,4 | 15 | 48,4 | 30 | 48,4 |
|  | Kyiv | 16 | 51,6 | 16 | 51,6 | 32 | 51,6 |

**Appendix J: Missing data information for primary and secondary outcomes (trial)**

|  | **Baseline non-missing (N = 62)** | | **Follow-up non-missing (N=41)** | |
| --- | --- | --- | --- | --- |
|  | n | % | n | % |
| Percentage of days abstinent (PDA) | 62 | 100 | 41 | 100 |
| Percentage of days with heavy drinking (PDHD) | 62 | 100 | 41 | 100 |
| Alcohol misuse: AUDIT | 62 | 100 | 41 | 100 |
| Alcohol misuse: ASSIST | 61 | 98,4 | 36 | 87,8 |
| Psychological distress: K10 mean score | 62 | 100 | 41 | 100 |
| Depression (MHAI) | 60 | 96,8 | 41 | 100 |
| Anxiety (MHAI) | 61 | 98,4 | 41 | 100 |
| PTSD (MHAI) | 60 | 96,8 | 41 | 100 |
| Overall mental health (MHAI) | 59 | 95,2 | 41 | 100 |
| Functional disability (MHAI)* | 50 | 80,6 | 37 | 90,2 |
| Perpetration of intimate partner violence: physical violence | 53 | 85,5 | 38 | 92,7 |
| Perpetration of intimate partner violence: sexual violence | 52 | 83,9 | 37 | 90,2 |

* 6 item measure excluding items with high missingness

**Appendix K: Characteristics of facilitators in feasibility trial**

| **Lay Health Care Provider** |  | **Sex** | **Work experience** | Education/organization | **Region of Ukraine** |
| --- | --- | --- | --- | --- | --- |
| IF001 |  | M | Priest, was in-training to become psychologist | Theological and musical education | Kyiv |
| IF002 |  | F | With previous professional mental health working experience | NaUKMA Center | Kyiv |
| IF003 |  | F | With previous professional mental health working experience | NaUKMA Center | Kyiv |
| IF004 |  | F | With previous professional mental health working experience | NaUKMA Center | Dnipro |
| IF005 |  | F | With previous professional mental health working experience | NaUKMA Center | Dnipro |
| IF006 |  | F | With previous professional mental health working experience | NaUKMA Center | Kyiv |
| IF007 |  | F | Social worker | NGO Caritas | Dnipro |
| IF008 |  | F | Social worker | NGO 'Proliska' | Dnipro |
|  |  |  |  |  |  |
|  |  |  |  |  |  |
|  |  |  |  |  |  |

**Appendix L: Session duration for each CHANGE session**

| Average time of sessions (min) | Session 1: M=80.72(range 35-135) - overall conducted 32 sessions  Session 2: M=82.44 (range 50-124) - overall conducted 27 sessions  Session 3: M=83.25 (range 50-150) - overall conducted 25 sessions  Session 4: M=76.68 (range 32-95) - overall conducted 23 sessions  Session 5: M=76.87 (range 60-95) - overall conducted 23 sessions  Session 6: M=76 (range 30-120) - overall conducted 23 sessions  + 1 additional session was conducted with the duration 110 min |
| --- | --- |

**Appendix M: Intervention fidelity checks per session**

| **Session** | **Fidelity score#1** | **Fidelity score#2*** | **Fidelity score#3*** | **Fidelity score#4*** |
| --- | --- | --- | --- | --- |
| Session 1 | 10/14(71,43%) | 13/14 (92,86%) |  |  |
| Session 2 | 11/17(64,7%) | 8/17(47,06%) | 14/17 (82,35%) | 9/17 (52,94%) |
| Session 3 | 19/19 (100%) | 12/19 (63,16%) |  |  |
| Session 4 | 17/19 (89,47%) | 18/19(94,74%) |  |  |
| Session 5 | 24/24 (100%) | 23/24(95,83%) |  |  |
| Session 6 | 18/24 (75%) | 21/24 (87,5%) |  |  |

*for session 1, session 3,session 4, session 5 and session 6 -two recordings (for each session number from two different participants and two different facilitators were taken). Also, for session 2 - four recordings (from three different facilitators and four different participants were taken). In total, 14 sessions got recorded, and fidelity of intervention delivery was assessed for 14 sessions.

**Appendix N: Primary and Secondary Outcomes by Treatment Arm**

|  |  | **CHANGE+EUC** | | **EUC** | | | **Minimally adjusted*** | | | | |  | **Fully adjusted**** | | |  | |  | |
| --- | --- | --- | --- | --- | --- | --- | --- | --- | --- | --- | --- | --- | --- | --- | --- | --- | --- | --- | --- |
|  |  | **N** |  | | **N** |  | |  |  |  |  | | |  |  | |  | |  | |
| **Total** | Baseline | 31 |  | | 31 |  | | - | - | - |  | | | - | - | | - | | - | |
|  | Follow-up | 16 |  | | 25 |  | | - | - | - |  | | | - | - | | - | | - | |
|  |  | **Mean** | **(SD)** | | **Mean** | **(SD)** | | **IRR** | **CI** | **p-value** | **N** | | | **IRR** | **CI** | | **p-value** | | **N** | |
| **Percentage of days abstinent (PDA)** | Baseline | 61,4 | (24.3) | | 55,0 | (27.0) | | 0,65 | (0.36, 1.18) | 0,15 | 41 | | | 0,57 | (0.30, 1.11) | | 0,10 | | 40 | |
|  | Follow-up | 75,4 | (26.6) | | 68,3 | (25.4) | |  |  |  |  | | |  |  | |  | |  | |
| **Percentage of days with heavy drinking (PDHD)** | Baseline | 18,9 | (20.8) | | 20,8 | (20.1) | | 0,55 | (0.21, 1.48) | 0,24 | 41 | | | 0,64 | (0.23, 1.76) | | 0,38 | | 40 | |
|  | Follow-up | 10,7 | (22.4) | | 10,3 | (12.7) | |  |  |  |  | | |  |  | |  | |  | |
|  |  | **Mean** | **(SD)** | | **Mean** | **(SD)** | | **Beta** | **CI** | **p-value** | **N** | | | **Beta** | **CI** | | **p-value** | | **N** | |
| **Alcohol misuse: AUDIT** | Baseline | 29,3 | (6.2) | | 27,0 | (5.7) | | 0,16 | (-3.21, 3.52) | 0,93 | 41 | | | -0,27 | (-4.36, 3.82) | | 0,89 | | 40 | |
|  | Follow-up | 20,2 | (4.7) | | 23,3 | (6.7) | |  |  |  |  | | |  |  | |  | |  | |
| **Alcohol misuse: ASSIST** | Baseline | 14,9 | (3.3) | | 15,7 | (3.4) | | -2,76 | (-7.44, 1.92) | 0,24 | 36 | | | -1,83 | (-7.37, 3.72) | | 0,50 | | 35 | |
|  | Follow-up | 13,1 | (5.1) | | 13,9 | (6.5) | |  |  |  |  | | |  |  | |  | |  | |
| **Psychological distress: K10 mean score** | Baseline | 22,5 | (5.7) | | 20,5 | (6.7) | | -4,67 | (-7.68, -1.65) | 0,003 | 41 | | | -4,12 | (-7.55, -0.69) | | 0,02 | | 40 | |
|  | Follow-up | 15,2 | (7.4) | | 18,0 | (7.1) | |  |  |  |  | | |  |  | |  | |  | |
| **Depression (MHAI)***** | Baseline | 1,10 | (0.51) | | 0,85 | (0.43) | | 0,66 | (0.37, 1.19) | 0,16 | 39 | | | 0,76 | (0.37, 1.54) | | 0,42 | | 38 | |
|  | Follow-up | 0,56 | (0.39) | | 0,72 | (0.52) | | -0,99 | 0,17 |  |  | | | -0,99 | 0,43 | |  | |  | |
| **Anxiety (MHAI)** | Baseline | 1,01 | (0.45) | | 0,97 | (0.59) | | -0,09 | (-0.39, 0.22) | 0,56 | 41 | | | 0,01 | (-0.34, 0.35) | | 0,97 | | 40 | |
|  | Follow-up | 0,70 | (0.53) | | 0,79 | (0.56) | |  |  |  |  | | |  |  | |  | |  | |
| **PTSD (MHAI)** | Baseline | 1,08 | (0.47) | | 0,89 | (0.45) | | -0,32 | (-0.56, -0.08) | 0,01 | 40 | | | -0,27 | (-0.54, -0.00) | | 0,05 | | 39 | |
|  | Follow-up | 0,65 | (0.44) | | 0,80 | (0.50) | |  |  |  |  | | |  |  | |  | |  | |
| **Overall mental health (MHAI)** | Baseline | 1,06 | (0.5) | | 0,87 | (0.43) | | -0,23 | (-0.49, 0.02) | 0,07 | 39 | | | -0,18 | (-0.46, 0.10) | | 0,20 | | 38 | |
|  | Follow-up | 0,64 | (0.41) | | 0,76 | (0.50) | |  |  |  |  | | |  |  | |  | |  | |
| **Functional disability (MHAI)****** | Baseline | 0,55 | (0.51) | | 0,40 | (0.38) | | -0,18 | (-0.45, 0.10) | 0,21 | 33 | | | -0,12 | (-0.53, 0.29) | | 0,55 | | 32 | |
|  | Follow-up | 0,27 | (0.48) | | 0,43 | (0.48) | | - | - | - | - | | | - | - | | - | | - | |
|  |  | **%** | **(n)** | | **%** | **(n)** | |  |  |  |  | | |  |  | |  | |  | |
| **Perpetration of intimate partner violence: physical violence****** | Baseline | 11,1 | (3) | | 7,7 | (2) | | - | - | - | - | | | - | - | | - | | - | |
|  | Follow-up | 0 | (0) | | 4,2 | (1) | | - | - | - | - | | | - | - | | - | | - | |
| **Perpetration of intimate partner violence: sexual violence****** | Baseline | 18,5 | (5) | | 12 | (3) | | - | - | - | - | | | - | - | | - | | - | |
|  | Follow-up | 0 | (0) | | 4,2 | (1) | | - | - | - | - | | | - | - | | - | | - | |

* Adjusted for baseline values and site (Kyiv/Dnipro)

** Adjusted for baseline values, site, age, educational attainment, and displacement status

*** Modelled as log (depression score) due to heteroskedasticity, so exp(beta) is presented and interpretable as percent change

**** Not modelled due to high missingness (functional disability) or zero cases (violence)

**Appendix O: Health Economic Outcomes by Treatment Arm**

|  | | **Arm** | | | | **F-up vs. BL** |
| --- | --- | --- | --- | --- | --- | --- |
| **CHANGE+EUC** | | **EUC** | | **Adjusted arm effect** |
| **N** | **Mean (SD)** | **N** | **Mean (SD)** | **beta (95% CI)** |
| EQ-5D value (Poland value set) | baseline | 31 | 0.92 (0.06) | 29 | 0.91 (0.14) |  |
| follow-up | 16 | 0.95 (0.06) | 25 | 0.92 (0.08) | -0.02 (0.02, -0.06) |
| EQ-5D-5L VAS score | baseline | 31 | 58.48 (19.05) | 31 | 66.03 (20.65) |  |
| follow-up | 16 | 73.62 (11.6) | 25 | 72.2 (18.56) | -3.34 (4.62, -11.31) |
| Subjective Wellbeing combined avg score | baseline | 31 | 4.83 (1.2) | 31 | 5.29 (1.32) |  |
| follow-up | 16 | 5.09 (0.77) | 25 | 5.22 (1.08) | -0.01 (0.59, -0.61) |

|  | **Time point** | **CHANGE+EUC** |  | **EUC** |  | **Baseline-adjusted** | | **N** |
| --- | --- | --- | --- | --- | --- | --- | --- | --- |
| **Total (N)** | Baseline | 30 |  | 36 |  | - | - | 66 |
|  | Follow-up | 28 |  | 32 |  | - | - | 60 |
|  |  | **Mean** | **(SD)** | **Mean** | **(SD)** | **Beta** | **CI** | **N** |
| **EQ-5D-5L** | Baseline | 0.53 | (0.32) | 0.57 | (0.39) | 0.08 | (-0.07, 0.24) | 60 |
|  | Follow-up | 0.70 | (0.30) | 0.62 | (0.32) |  |  |  |
| **EQ-5D-5L VAS** | Baseline | 47.96 | (26.81) | 51.34 | (24.76) | 7.40 | (-4.66,19.45) | 60 |
|  | Follow-up | 60.11 | (24.28) | 53.13 | (22.28) |  |  |  |
| **OxCAP-MH** | Baseline | 51.84 | (10.38) | 50.15 | (11.78) | -0.66 | (-5.93,4.61) | 60 |
|  | Follow-up | 49.81 | (10.04) | 49.97 | (11.03) |  |  |  |
| **SWB** | Baseline | 10.79 | (2.56) | 12.593 | (2.96) | 0.284 | (-1.69, 2.26) | 60 |
|  | Follow-up | 14.82 | (3.43) | 14.56 | (3.73) |  |  |  |

**References**

1. Eldridge SM, Chan CL, Campbell MJ, et al. CONSORT 2010 statement: extension to randomised pilot and feasibility trials. *BMJ* 2016; **355**: i5239.

2. Sobell LC, Sobell MB. Timeline follow-back: A technique for assessing self-reported alcohol consumption. Measuring alcohol consumption: Psychosocial and biochemical methods. Totowa, NJ: Humana Press; 1992.

3. Saunders JB, Aasland OG, Babor TF, de la Fuente JR, Grant M. Development of the Alcohol Use Disorders Identification Test (AUDIT): WHO Collaborative Project on Early Detection of Persons with Harmful Alcohol Consumption--II. *Addiction* 1993; **88**(6): 791-804.

4. Ramachandran, A., Makhashvili, N., Javakhishvili, J., Karachevskyy, A., Kharchenko, N., Shpiker, M., Ezard, N., Fuhr, D. C., & Roberts, B. (2019). Alcohol use among conflict-affected persons in Ukraine: Risk factors, coping and access to mental health services. *European Journal of Public Health*, *29*(6), 1141–1146. <https://doi.org/10.1093/eurpub/ckz117>

5. Humeniuk R, Ali R, Babor TF, et al. Validation of the Alcohol, Smoking And Substance Involvement Screening Test (ASSIST). *Addiction* 2008; **103**(6): 1039-47.

6. Kessler RC, Andrews G, Colpe LJ, et al. Short screening scales to monitor population prevalences and trends in non-specific psychological distress. *Psychol Med* 2002; **32**(6): 959-76.

7. Dubenko A, Morelli R, Cross JH, Hall J, Kharytonov V, Michaelis R, et al. Mental health and quality of life of individuals with epilepsy during the war in Ukraine. Epilepsia. 2024 Jun 29;epi.18052.

8. Summers A, Leidman E, Pereira Figueira Periquito IM, Bilukha OO. Serious psychological distress and disability among older persons living in conflict affected areas in eastern Ukraine: a cluster-randomized cross-sectional household survey. Confl Health. 2019 Dec;13(1):10.

9. Doty B, Haroz EE, Singh NS, Bogdanov S, Bass JK, Murray LK, et al. Adaptation and testing of an assessment for mental health and alcohol use problems among conflict-affected adults in Ukraine. Confl Health. 2018 Dec;12(1):34.

10. Bogdanov, S. *et al.* (2021) ‘A randomized-controlled trial of community-based transdiagnostic psychotherapy for veterans and internally displaced persons in Ukraine’, *Global Mental Health*, 8, p. e32. doi:10.1017/gmh.2021.27.

11. Fulu E, Jewkes R, Roselli T, Garcia-Moreno C. Prevalence of and factors associated with male perpetration of intimate partner violence: findings from the UN Multi-country Cross-sectional Study on Men and Violence in Asia and the Pacific. *Lancet Glob Health* 2013; **1**(4): e187-207.

12. Group TE. EuroQol-a new facility for the measurement of health-related quality of life. *Health policy* 1990; **16**(3): 199-208.

13. Economico OdCyD. Guidelines on measuring subjective well-being: OECD; 2013.

14. Proctor E, Silmere H, Raghavan R, et al. Outcomes for implementation research: conceptual distinctions, measurement challenges, and research agenda. *Adm Policy Ment Health* 2011; **38**(2): 65-76.

15. StataCorp. Stata Statistical Software: Release 19. . College Station, TX: StataCorp LLC. ; 2025.

16. Wagner B, Riggs P, Mikulich-Gilbertson S. The importance of distribution-choice in modeling substance use data: a comparison of negative binomial, beta binomial, and zero-inflated distributions. *Am J Drug Alcohol Abuse* 2015; **41**(6): 489-97.

17. Golicki, Dominik et al. Interim EQ-5D-5L Value Set for Poland: First Crosswalk Value Set in Central and Eastern Europe Value in Health Regional Issues, Volume 4, 19 - 23
